# Supplementary material for: Effects of Different Donor Ages on the Growth of Cutting Seedlings Propagated from Ancient Platycladus orientalis
Source: MDPI journal article supplement (doi:10.3390/plants12091754), 2023-04-25
Supplement: s1 [file s1]

**Supplementary Table S1.** Primers of the candidate genes designed for qRT-PCR.

| Gene ID               | Gene abbreviation | Gene name                                                  | Size (bp) | Forward primer                                |
|-----------------------|-------------------|------------------------------------------------------------|-----------|-----------------------------------------------|
|                       |                   |                                                            |           | Reverse primer                                |
| TRINITY_DN73607_c0_g1 | <i>ARF</i>        | <i>Auxin response factor 4</i>                             | 113       | TGTTTCGACAAGTGCAAGAGG<br>CACCTTGTCTCCTCCCAAAA |
| TRINITY_DN7525_c0_g2  | <i>RPS2</i>       | <i>Resistance to Pseudomonas syringae 2</i>                | 140       | CTTGGAAGGTTTGTGGAGGA<br>CATGGTGGCAGTTTTGTCTG  |
| TRINITY_DN984_c0_g3   | <i>FLS2</i>       | <i>Elongation factor Tu receptor</i>                       | 95        | TCCCATAACAATCCCACCAAG<br>CGCCTAGCTCAATGGTTGAT |
| TRINITY_DN3540_c0_g2  | <i>CCR</i>        | <i>Cinnamoyl-CoA reductase</i>                             | 123       | TATCGAACCGGAGCAGAATC<br>TGCGAGCTAAGAAAGGGAAA  |
| TRINITY_DN27271_c0_g2 | <i>JAR1_4_6</i>   | <i>Jasmonate Resistant 1</i>                               | 136       | GAGGTGCTTGGAGTCCTGAA<br>TTTCCACATCGAAGGAGACC  |
| TRINITY_DN2934_c0_g1  | <i>RPS3</i>       | <i>Resistance to Pseudomonas syringae pv. maculicola 1</i> | 80        | GCGGTATGGGTGTGTAGTGCT<br>GTCGTTGCCGAAGTACCAAT |
| TRINITY_DN6298_c0_g1  | <i>CML</i>        | <i>Calmodulin-like protein</i>                             | 81        | GCGCAAGTTTGGCTCTTTAC<br>AGCCCATGAATCATTTGAGC  |
| TRINITY_DN12112_c0_g1 | <i>JAZ</i>        | <i>Jasmonate ZIM-domain protein</i>                        | 93        | CCAAAGGGCCATTTTGTGTGT<br>CGTGTTGAAGCCAAATTCT  |
